# Supplementary material
Source: HighWire-hosted journal article supplement (https://www.highwirestage.com/highwire/filestream/103284/field_highwire_adjunct_files/0/0285.pdf)
Supplement: 0285.pdf [file 0285.pdf]

## **Supplemental Material**

**Table S1** Search Terms

**Table S2** Outcome definitions of symptomatic thromboembolic events in the individual studies

**Table S3** Summary of risk assessment using Newcastle-Ottawa Scale for cohort studies

**Table S4** Characteristics of all included studies

**Table S5** Subgroup analysis of symptomatic thromboembolism events and hemorrhage events in cohort studies comparing antiplatelet testing guided and standard group in patients with intracranial aneurysms underwent endovascular treatment

**Figure S1** PRISMA Flow Diagram

**Figure S2** Summary of Risk Assessment Using the Cochrane Collaboration's Tool for Assessing the Risk of Bias for randomized controlled study and Newcastle-Ottawa Scale for randomized controlled studies

**Figure S3** Forest plot of morbidity and mortality comparing platelet function testing guided group and standard group

**Figure S4** Sensitivity analysis of all outcomes

**Table S1** Search Terms

---

PubMed 182

---

((intracranial) OR (cerebral)) AND (aneurysm)) AND ((platelet function test) OR (light transmittance aggregometry) OR (LTA) OR (vasodilator stimulated phosphoprotein) OR (VASP) OR (VerifyNow) OR (Thromboelastography))

---

Embase 192

---

#1 'intracranial aneurysm'/exp

#2 'platelet function test' OR (('platelet'/exp OR platelet) AND function AND test)

#3 light AND transmittance AND aggregometry

#4 LTA

#5 vasodilator AND stimulated AND phosphoprotein

#6 VASP

#7 VerifyNow

#8 Thromboelastography

#9 TEG

#10 #2 OR #3 OR #4 OR #5 OR #6 OR #7 OR #8 OR #9

#11 #1 AND #10

---

Cochrane library of clinical trials 4

---

#1 Mesh descriptor: [Intracranial Aneurysm] explode all trees

#2 Mesh descriptor: [Platelet Function Tests] explode all trees

#9 #1 AND #2

---

**Table S2** Outcome definitions of symptomatic thromboembolic events in the individual studies

| Study             | Definition                                                                                                                                                                                                                                                                              |
|-------------------|-----------------------------------------------------------------------------------------------------------------------------------------------------------------------------------------------------------------------------------------------------------------------------------------|
| Li/2021 B         | Ischemic stroke, TIA, stent thrombosis, urgent revascularization, or cerebrovascular death.                                                                                                                                                                                             |
| Higashiguchi/2021 | A DWI-positive image with neurological findings of a transient ischemic attack or cerebral infarction.                                                                                                                                                                                  |
| Moon/2022         | TIA or major stroke.                                                                                                                                                                                                                                                                    |
| Oran/2015         | Not available.                                                                                                                                                                                                                                                                          |
| Cheung/2020       | Not available.                                                                                                                                                                                                                                                                          |
| Kim/2022          | Any symptomatic events with DWI-positive image.                                                                                                                                                                                                                                         |
| Aoun/2017         | Stroke.                                                                                                                                                                                                                                                                                 |
| Neyens/2020       | A combination of clinical symptoms and radiographic findings including computed tomography, computed tomography angiography, magnetic resonance imaging, or digital subtraction angiography.                                                                                            |
| Li/2021 A         | TIA or symptomatic ischemic infarctions.                                                                                                                                                                                                                                                |
| Koh/2023          | Thromboembolism detected during stent assisted coiling (intraprocedural) or a TIA or ischemic stroke with evidence of infarction on DWI that occurred in the vascular territory, consistent with the location of the treated aneurysm within 30 days of the procedure (postprocedural). |

TIA, transient ischemic attack; DWI, diffusion-weighted imaging

**Table S3** Summary of risk assessment using Newcastle-Ottawa Scale for cohort studies

| Study/year        | Selection                                |                                       |                                    | Comparability                          |                               | Exposure/Outcome                  |                               |                              | Total Score |
|-------------------|------------------------------------------|---------------------------------------|------------------------------------|----------------------------------------|-------------------------------|-----------------------------------|-------------------------------|------------------------------|-------------|
|                   | Represent-<br>ativeness<br>of<br>Cohort* | Selection<br>of<br>Control<br>Cohort* | Ascertain-<br>ment of<br>Exposure* | Outcome<br>Not<br>Present at<br>Start* | Comparability<br>of Cohorts** | Assessme<br>nt of<br>Outcome<br>* | Length<br>of<br>Follow<br>Up* | Adequacy<br>of Follow<br>Up* |             |
| Oran/2013         | *                                        | *                                     | *                                  | *                                      | **                            | *                                 | *                             | *                            | 9           |
| Brinjikji/2015    | *                                        | *                                     | *                                  | *                                      | **                            | *                                 | *                             | *                            | 8           |
| Aoun/2017         | *                                        | *                                     | *                                  | *                                      | *                             | *                                 | *                             | *                            | 8           |
| Cheung/2020       | *                                        | *                                     | *                                  | *                                      | **                            | *                                 | *                             | *                            | 9           |
| Neyens/2020       | *                                        | *                                     | *                                  | *                                      | **                            | *                                 | *                             | *                            | 9           |
| Higashiguchi/2021 | *                                        | *                                     | *                                  | *                                      | **                            | *                                 | *                             | *                            | 8           |
| Li A/2021         | *                                        | *                                     | *                                  | *                                      | **                            | *                                 | *                             | *                            | 8           |
| Kim/2022          | *                                        | *                                     | *                                  | *                                      | *                             | *                                 | *                             | *                            | 8           |
| Moon/2022         | *                                        | *                                     |                                    | *                                      | *                             |                                   |                               |                              | 4           |
| Koh/2023          | *                                        | *                                     | *                                  | *                                      | **                            | *                                 | *                             | *                            | 9           |

**Table S4** Characteristics of all included studies

| Author/year     | Country       | Study design                       | Type of aneurysms | Endovascular procedure                        | Type of platelet testing         | Initiate strategy                                                                                            | Antiplatelet adjustment strategy                                                                                                                                                                        | Follow-up duration (month) | Sample size                     |                |
|-----------------|---------------|------------------------------------|-------------------|-----------------------------------------------|----------------------------------|--------------------------------------------------------------------------------------------------------------|---------------------------------------------------------------------------------------------------------------------------------------------------------------------------------------------------------|----------------------------|---------------------------------|----------------|
|                 |               |                                    |                   |                                               |                                  |                                                                                                              |                                                                                                                                                                                                         |                            | Guided group/No. Adjustment (%) | Standard group |
| Oran /2013      | Turkey        | Retrospective, cohort              | Unruptured        | Pipeline flow-diverting stents                | Multiplate                       | ASA initial dose 300mg followed by 100-300mg daily and clopidogrel initial dose 600mg followed by 75mg daily | Test at the day of procedure; if clopidogrel platelet aggregation > 468 AUC(47U), add ticlopidine 1g and postpone the procedure 4h, or not postpone the procedure and give tirofiban 0.25-1mg           | 1                          | 68/12 (17.6)                    | 32             |
| Brinjikji /2015 | Six countries | Retrospective, multicenter, cohort | Unruptured        | Pipeline flow-diverting stents                | NA                               | NA                                                                                                           | Test 1 day before procedure                                                                                                                                                                             | 22.5                       | 511/NA                          | 187            |
| Aoun /2017      | US            | Retrospective, cohort              | Unruptured        | Stent-assisted coiling                        | Whole blood aggregometry testing | ASA 325mg and clopidogrel 75mg daily for 5 days                                                              | Test 24h before procedure: if inadequate response ( > 10 $\Omega$ ), give ASA 325mg and clopidogrel 600mg again before the procedure followed by clopidogrel 75-150mg the next day before the procedure | 1                          | 152/24 (15.8)                   | 114            |
| Cheung /2020    | Australia     | Retrospective, cohort              | Unruptured        | Stent-assisted coiling, flow-diverting stents | PFA-100                          | ASA 100mg and clopidogrel 75mg daily for 8 days                                                              | Test 1 day before procedure: if clopidogrel time $\leq$ 150s (50% above the maximum normal CT), change ASA to 75mg daily, clopidogrel to ticagrelor (initial dose 180mg followed by 90mg twice a day)   | 13                         | 65/23 (35.4)                    | 52             |

|                 |       |                                                      |                               |                                                                                |           |                                                                                                                                              |                                                                                                                                                                                                                                                                                                                                                                                                                                                                                             |           |                  |     |
|-----------------|-------|------------------------------------------------------|-------------------------------|--------------------------------------------------------------------------------|-----------|----------------------------------------------------------------------------------------------------------------------------------------------|---------------------------------------------------------------------------------------------------------------------------------------------------------------------------------------------------------------------------------------------------------------------------------------------------------------------------------------------------------------------------------------------------------------------------------------------------------------------------------------------|-----------|------------------|-----|
| Neyens<br>/2020 | US    | Retrospective,<br>cohort                             | Unruptured<br>and<br>ruptured | Pipeline<br>flow-diverting<br>stents                                           | VerifyNow | Unruptured: ASA 325-600mg<br>and clopidogrel 600mg daily for<br>1-2 days<br><br>Ruptured: ASA and clopidogrel<br>at the end of the procedure | Test at the day of procedure<br>(elective) or after washout of any<br>glycoprotein IIb/IIIa (nonelective<br>emergent): ARU $\geq$ 550 represent<br>ASA hyporesponsive; if PRU $\geq$ 194,<br>change clopidogrel to ticagrelor or<br>continued clopidogrel                                                                                                                                                                                                                                   | 6         | 159/48<br>(30.2) | 110 |
| Li<br>/2021 A   | China | Retrospective,<br>single-center,<br>cohort           | Ruptured                      | Stent-assisted<br>coiling                                                      | TEG       | ASA 300mg and clopidogrel<br>300mg 2h before the procedure<br>followed by ASA 100mg and<br>clopidogrel 75mg daily                            | Test 3 days after surgery and 6<br>weeks after discharge: When<br>MA-ADP $<31$ , if AAi $\geq$ 95% and<br>ADPi $\geq$ 90%, change treatment plan<br>to ASA 25–100mg daily or<br>clopidogrel, 37.5–75mg daily,<br>otherwise ASA 50–100mg and<br>clopidogrel 25–50mg daily; When<br>31 $\leq$ MA-ADP $\leq$ 47, if AAi $\geq$ 95%,<br>and/or ADPi $\geq$ 90%, change<br>treatment plan to ASA 50–100mg<br>and clopidogrel 25–50mg daily,<br>otherwise ASA 100mg and<br>clopidogrel 75mg daily | 11 (7,19) | 93/65 (69.9)     | 52  |
| Li<br>/2021 B   | China | Prospective,<br>single-center,<br>open-label,<br>RCT | Unruptured                    | Standard<br>coiling,<br>stent-assisted<br>coiling,<br>flow-diverting<br>stents | LTA       | ASA 100mg and clopidogrel<br>75mg daily for 5 days                                                                                           | Test 1 day before procedure:<br>if $>50\%$ MPA response to ADP,<br>change clopidogrel to ticagrelor<br>(initial dose 180mg followed by<br>90mg twice a day); if HPR on ASA,<br>change ASA to 200mg daily                                                                                                                                                                                                                                                                                    | 1         | 157/55<br>(35.0) | 157 |

|                    |       |                                    |            |                                                                                           |                         |                                                  |                                                                                                                                                                                                     |    |                |      |
|--------------------|-------|------------------------------------|------------|-------------------------------------------------------------------------------------------|-------------------------|--------------------------------------------------|-----------------------------------------------------------------------------------------------------------------------------------------------------------------------------------------------------|----|----------------|------|
|                    |       |                                    |            |                                                                                           |                         |                                                  | Test 14 days after procedure: if low platelet reactivity following previous adjustment, change ticagrelor to 45mg twice a day, change ASA to 100mg daily                                            |    |                |      |
| Higashiguchi /2021 | Japan | Prospective, single center, cohort | Unruptured | Standard coiling, balloon-assisted coiling, stent-assisted coiling, flow-diverting stents | VerifyNow               | ASA 100mg and clopidogrel 75mg daily for 14 days | Test 1 day before procedure: if PRU $\geq$ 240, change clopidogrel to prasugrel (initial dose 20mg daily followed by 3.75mg daily); if PRU < 100, change clopidogrel to prasugrel (1.875mg daily)   | 1  | 167/27 (16.2)  | 50   |
| Moon /2022         | Korea | Retrospective, cohort              | Unruptured | Standard coiling, stent-assisted coiling, flow-diverting stents                           | VerifyNow               | ASA and clopidogrel                              | Change to low dose prasugrel according to PRU                                                                                                                                                       | NA | 949/NA         | 1011 |
| Kim /2022          | Korea | Retrospective, cohort              | Unruptured | Stent-assisted coiling                                                                    | VerifyNow               | ASA 100mg and clopidogrel 75mg daily for 5 days  | If PRU $\geq$ 240, add cilostazol (initial dose 200mg followed by 50mg twice a day)                                                                                                                 | NA | 274/146 (53.3) | 153  |
| Koh /2023          | Korea | Retrospective, cohort              | Unruptured | Stent-assisted coiling                                                                    | VerifyNow or Multiplate | ASA 100mg and clopidogrel 75mg daily for 5 days  | Test 1 day before procedure: PRU $\geq$ 220 (VerifyNow) or antiplatelet aggregation units $\geq$ 46 (Multiplate), 1) add cilostazol (initial dose 200 mg followed by 100 mg twice a day), 2) change | 1  | 762/286 (37.5) | 924  |

clopidogrel to ticlopidine (initial dose 500 mg followed by 250 mg twice a day), prasugrel (initial dose 20 or 30 mg followed by 5 or 10 mg), or ticagrelor (initial dose 180 mg followed by 90 mg twice a day)

---

ASA, aspirin; CLO, clopidogrel, MA-ADP, adenosine diphosphate-induced platelet-fibrin clot strength; AAi, arachidonic acid inhibition; ADPi, adenosine diphosphate inhibition; PRU, P2Y<sub>12</sub> reaction units; AUC, aggregation curve; CT, closure time; ARU, aspirin reaction unit; NA, not applicable; RCT, randomized controlled trial; Thromboelastography-platelet mapping; LTA, Light transmittance aggregometry



**Table S5** Subgroup analysis of symptomatic thromboembolism events and hemorrhage events in cohort studies comparing antiplatelet testing guided and standard group in patients with intracranial aneurysms underwent endovascular treatment

| Outcomes/subgroups     |                                                               | Symptomatic thromboembolism events |                         |                    |                      | Hemorrhage events     |                   |                    |                      |
|------------------------|---------------------------------------------------------------|------------------------------------|-------------------------|--------------------|----------------------|-----------------------|-------------------|--------------------|----------------------|
|                        |                                                               | Study<br>/sample size              | OR (95%CI)              | I <sub>2</sub> (%) | P <sub>between</sub> | Study<br>/sample size | OR (95%CI)        | I <sub>2</sub> (%) | P <sub>between</sub> |
| Endovascular procedure | Stent-assisted coiling                                        | 3/2097                             | 0.43 (0.18-1.02)        | 43                 | 0.75                 | 3/2097                | 0.52 (0.17-1.66)  | 67                 | 0.82                 |
|                        | Pipeline flow diverting stenting                              | 2/369                              | 0.35 (0.03-4.64)        | 66                 |                      | 2/369                 | 0.82 (0.26-2.64)  | 0                  |                      |
|                        | Combined treatment                                            | 4/2721                             | 0.61 (0.36-1.02)        | 0                  |                      | 1/217                 | -                 | -                  |                      |
| Adjustment strategy    | Adjust DAPT dose                                              | 2/411                              | 0.33 (0.05-2.12)        | 36                 | 0.88                 | 2/411                 | 0.27 (0.05, 1.60) | 57                 | 0.29                 |
|                        | Change clopidogrel other thienopyridines                      | 4/2563                             | 0.64 (0.40-1.02)        | 18                 |                      | 2/486                 | 0.58 (0.25, 1.36) | 0                  |                      |
|                        | Add other drugs                                               | 2/527                              | 0.35 (0.03, 4.78)       | 64                 |                      | 1/100                 | -                 | -                  |                      |
|                        | Change to clopidogrel other thienopyridines or add cilostazol | 1/1686                             | -                       | -                  |                      | 1/1686                | -                 | -                  |                      |
| Race                   | Asian                                                         | 5/4435                             | <b>0.62 (0.45-0.86)</b> | <b>0</b>           | 0.24                 | 3/2048                | 0.51 (0.15-1.66)  | 68                 | 0.72                 |
|                        | Caucasian                                                     | 4/752                              | <b>0.32 (0.11-0.92)</b> | <b>55</b>          |                      | 3/635                 | 0.66 (0.30-1.46)  | 0                  |                      |

OR, odds ratio; CI, Confidence interval; P<sub>between</sub>, P-value between subgroups; PFT, platelet function testing; WBA, whole blood aggregometry; LTA, light transmission aggregometry; TEG, thrombelastography; **bold** indicates significant difference

**Figure S1 PRISMA Flow Diagram**

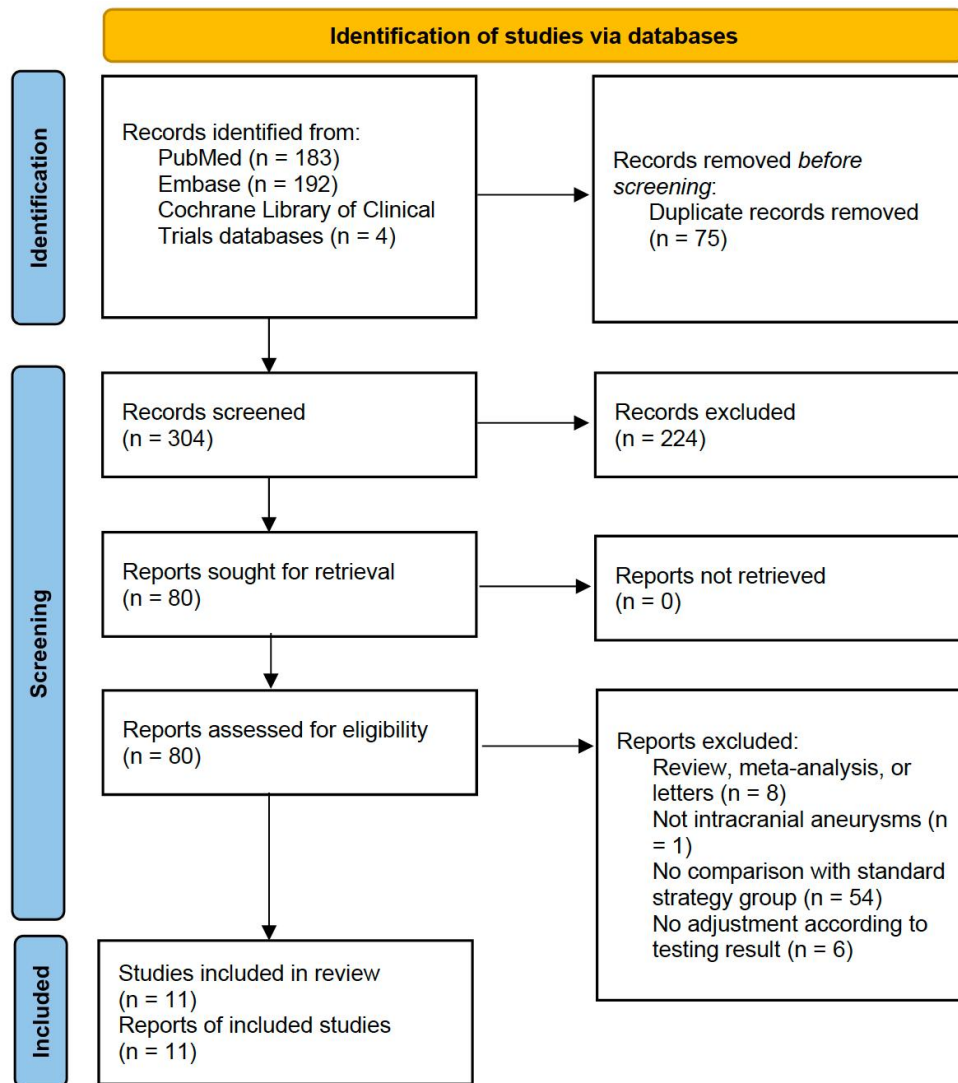

**Figure S2** Summary of risk assessment using the Cochrane Collaboration's tool for assessing the risk of bias

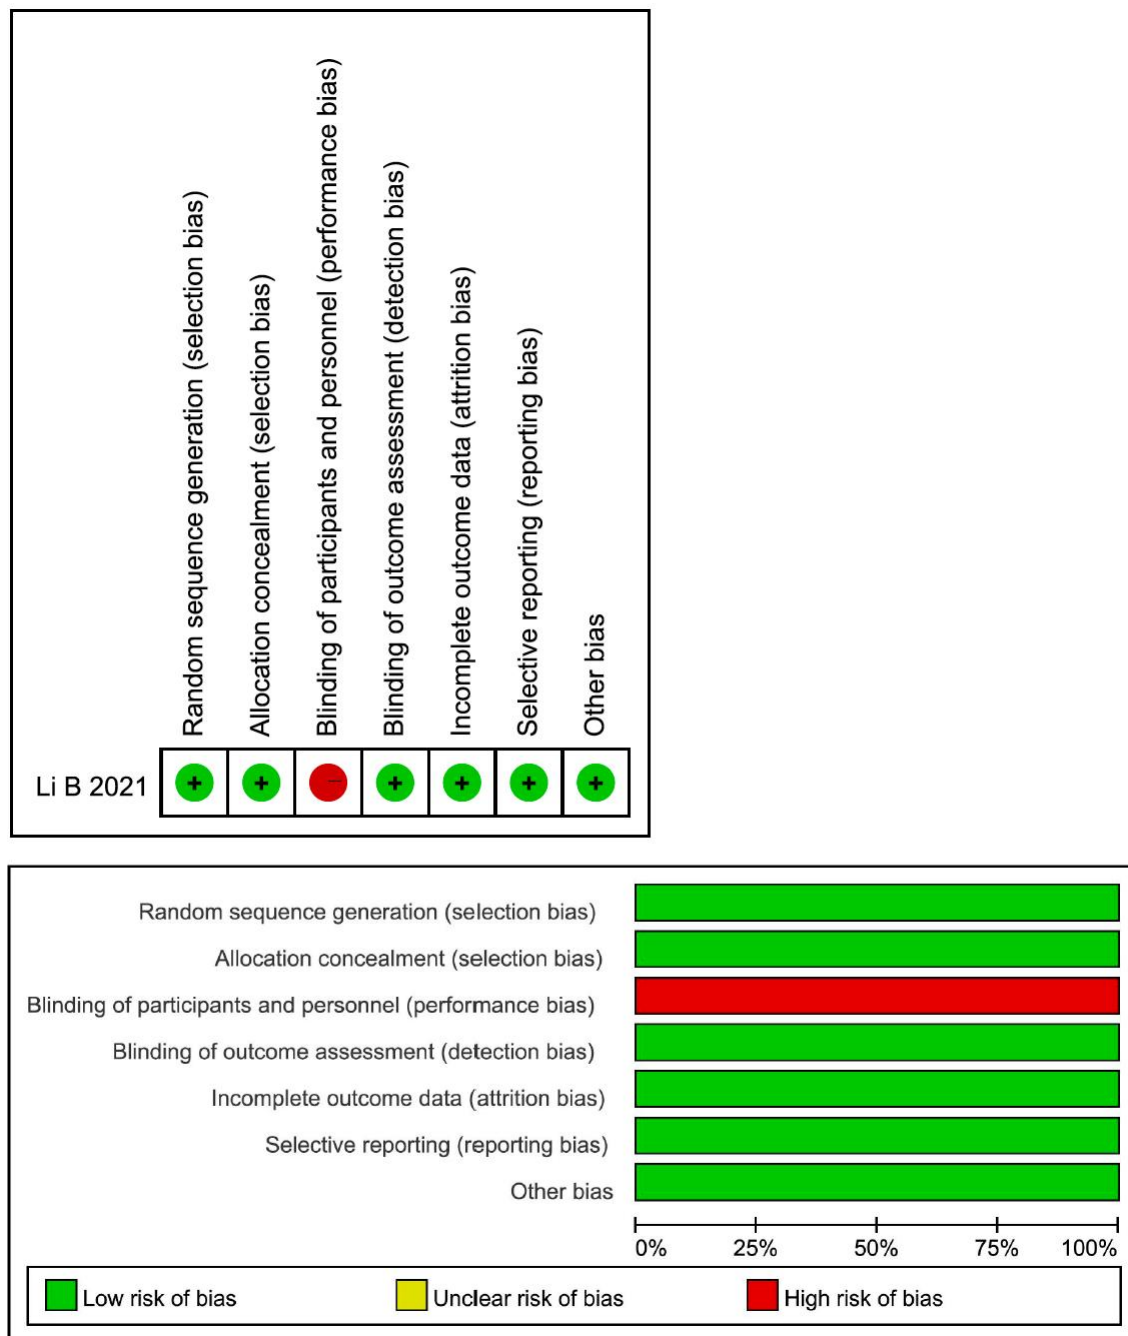

**Figure S3** Forest plot of morbidity and mortality comparing platelet function testing guided group and standard group

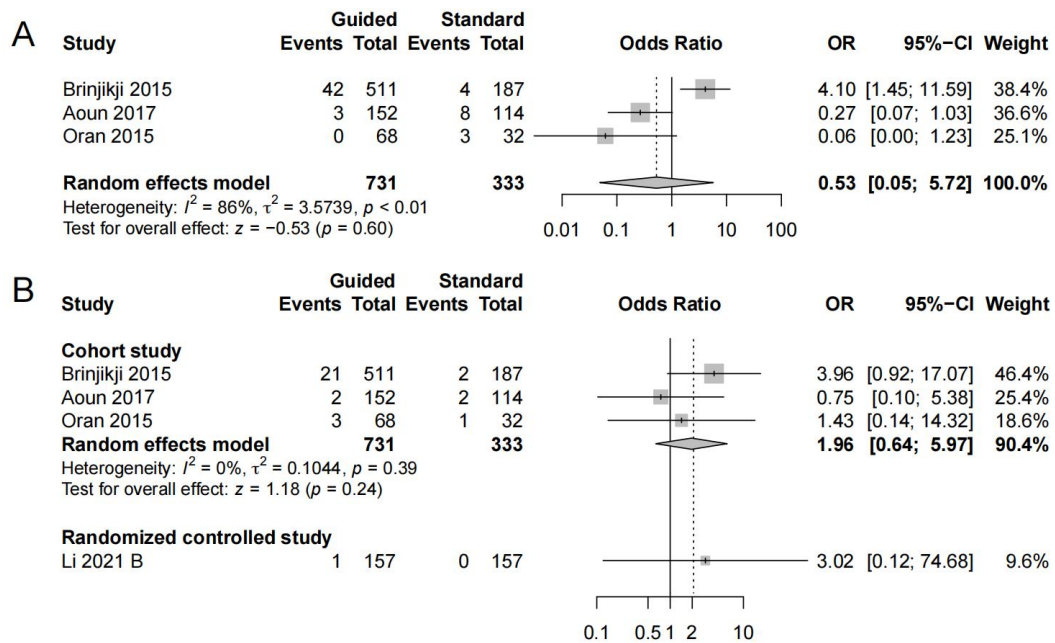

A, morbidity; B, mortality; OR, odds ratio; CI, confidence interval

**Figure S4** Sensitivity analysis of all outcomes including all cohort studies

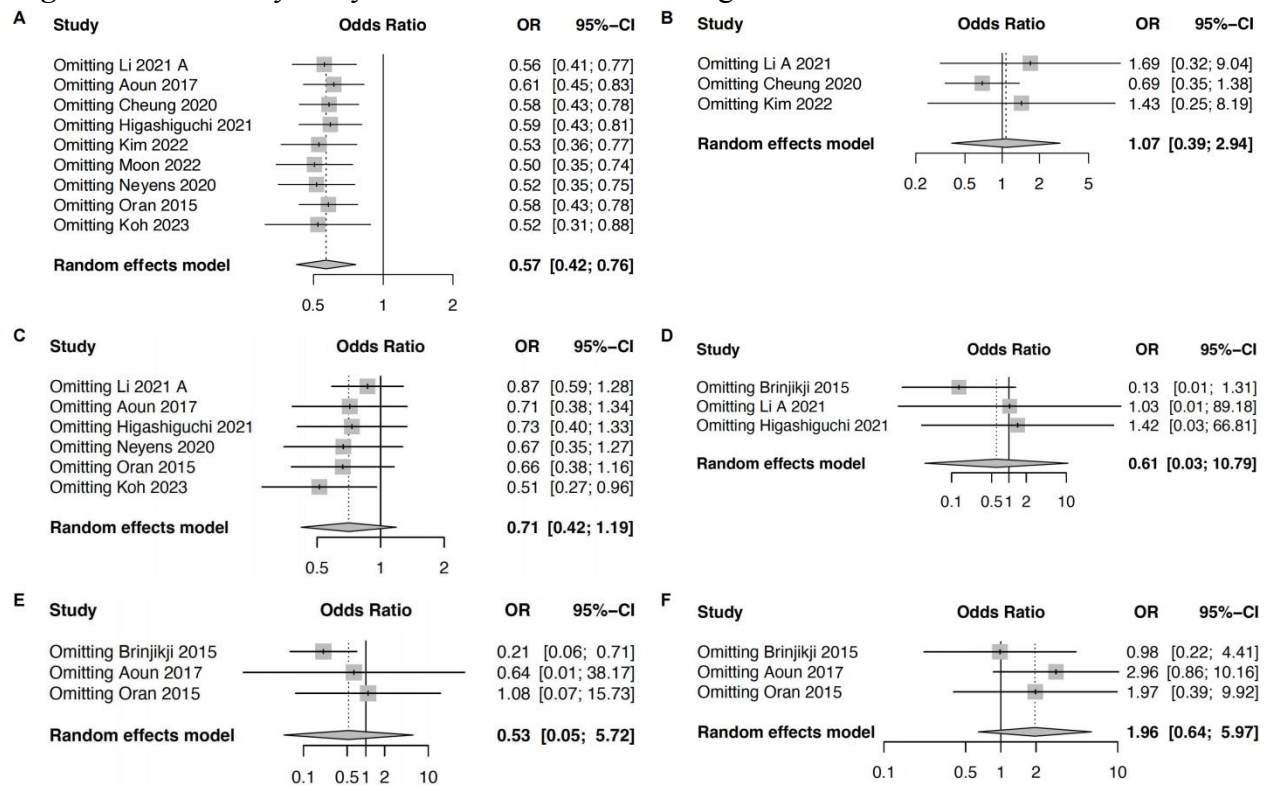

A, symptomatic thromboembolism events; B, asymptomatic thromboembolism events; C, hemorrhage events; D, intracranial hemorrhage events; E, morbidity; F, mortality; OR, odds ratio; CI, confidence interval
